# Supplementary material
Source: PubMed Central journal article supplement (PMC3912034)
Supplement: cbt-14-1113-s01.pdf [file cbt-14-1113-s01.pdf]

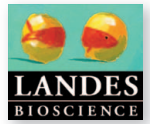

## **Supplemental Material to:**

**Anna Crispo, Maddalena Barba, Matteo Malvezzi,  
Grazia Arpino, Maria Grimaldi, Tiziana Rosso,  
Emanuela Esposito, Domenico Sergi, Gennaro Ciliberto,  
Antonio Giordano, and Maurizio Montella**

**Cancer mortality trends between 1988 and 2009 in the  
metropolitan area of Naples and Caserta, Southern Italy:  
Results from a joinpoint regression analysis**

**Cancer Biology & Therapy 2013; 14(12)  
<http://dx.doi.org/10.4161/cbt.26425>**

**<http://www.landesbioscience.com/journals/cbt/article/26425/>**

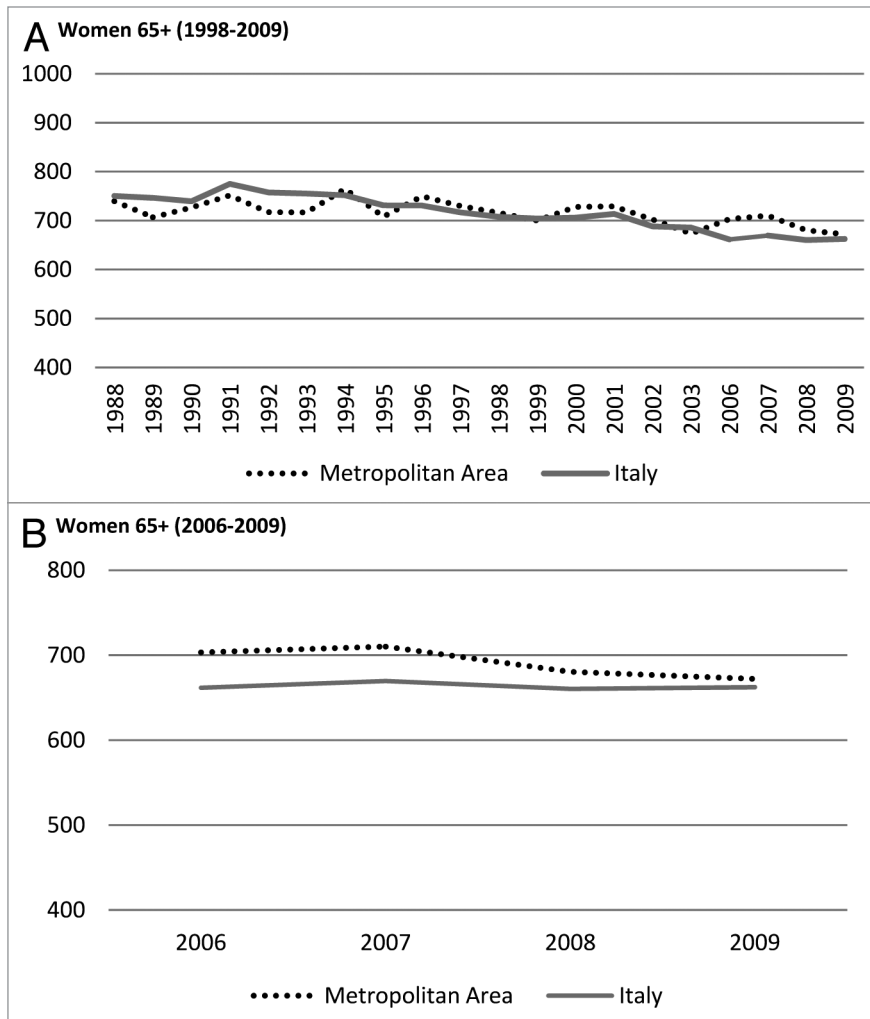

**Figure S1. (A)** Word standardized mortality rates  $\times$  100 000 inhabitants (dotted line, metropolitan area; solid line, Italy) from 1988 to 2009 for all cancer sites in females aged 65 years and older. **(B)** Word standardized mortality rates  $\times$  100 000 inhabitants in females aged 65 years and older (dotted line, metropolitan area; solid line, Italy) from 2006 to 2009 for all cancer sites.
